# Supplementary figures and images for: Synthesis, crystal and electronic structures, physical properties and121Sb and151Eu Mössbauer spectroscopy of the alumo-antimonide Zintl-phase Eu5Al2Sb6
Source: Royal Society of Chemistry journal article supplement (doi:10.1039/c7qm00057j), 2017-01-01

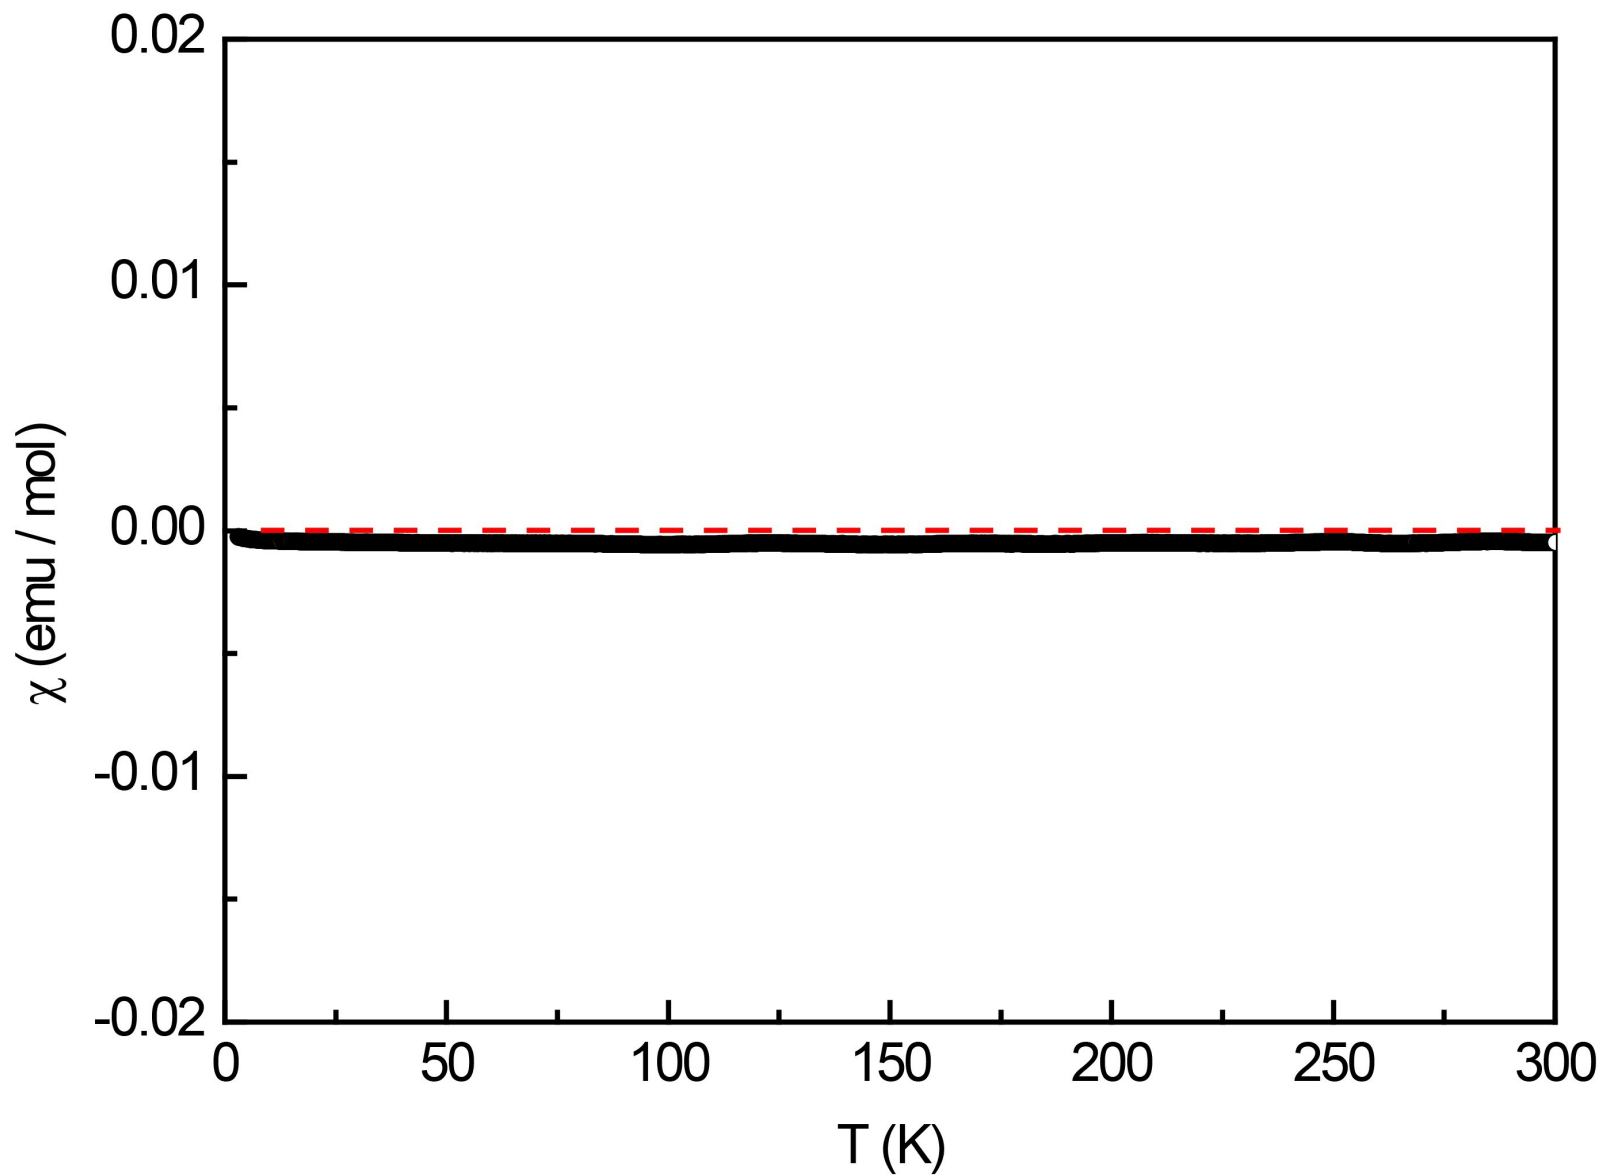

Supplement: c7qm00057j2.pdf [file c7qm00057j2.pdf]
